# Supplementary material for: Safety of BCG vaccination and revaccination in healthcare workers
Source: PubMed Central journal article supplement (PMC10411308; doi:10.1080/21645515.2023.2239088), 2023-08-08
Supplement: KHVI_A_2239088_SM2767.pdf [file KHVI_A_2239088_SM2767.pdf]

**Supplementary Table 1.**

Local injection site reaction toxicity grading scale

| <b>Local reaction</b>        | <b>Grade 0</b><br>None | <b>Grade 1</b><br>Mild                                                                          | <b>Grade 2</b><br>Moderate                                                                                                        | <b>Grade 3</b><br>Severe                                                              | <b>Grade 4</b><br>Potentially life-threatening |
|------------------------------|------------------------|-------------------------------------------------------------------------------------------------|-----------------------------------------------------------------------------------------------------------------------------------|---------------------------------------------------------------------------------------|------------------------------------------------|
| <b>Pain</b>                  | None                   | Does not interfere with activity                                                                | Repeated use of non-narcotic pain reliever > 24 hours or interferes with activity                                                 | Any use of narcotic pain reliever or prevents daily activity                          | Emergency room visit or hospitalisation        |
| <b>Tenderness</b>            | None                   | Mild discomfort to touch                                                                        | Discomfort with movement                                                                                                          | Significant discomfort at rest                                                        | Emergency room visit or hospitalization        |
| <b>Erythema/redness</b>      | None                   | 2.5 - 5 cm                                                                                      | 5.1 - 10 cm                                                                                                                       | >10 cm                                                                                | Necrosis or exfoliative dermatitis             |
| <b>Swelling / induration</b> | None                   | 2.5 - 5 cm and does not interfere with activity                                                 | 5.1 - 10 cm or interferes with activity                                                                                           | >10 cm or prevents daily activity                                                     | Necrosis                                       |
| <b>Itch</b>                  | None                   | Itching localised to injection site that is relieved spontaneously or in <48 hours of treatment | Itching beyond the injection site that is not generalised OR Itching localised to injection site requiring ≥48 hours of treatment | Generalised itching causing inability to perform usual social & functional activities | Not applicable                                 |

Injection site pain, tenderness, erythema and swelling, as per Food and Drug Administration. (2007). "Guidance for Industry: toxicity grading scale for healthy adult and adolescent volunteers enrolled in preventive vaccine clinical". Available from <https://www.fda.gov/downloads/BiologicsBloodVaccines/GuidanceComplianceRegulatoryInformation/Guidances/Vaccines/ucm091977.pdf>.

Injection site itch as per U.S. Department of Health and Human Services, National Institutes of Health, National Institute of Allergy and Infectious Diseases, Division of AIDS. Division of AIDS (DAIDS) (2017). "Table for Grading the Severity of Adult and Pediatric Adverse Events, Corrected Version 2.1". Available from: <https://rsc.niaid.nih.gov/sites/default/files/daidsgradingcorrectedv21.pdf>

## Supplementary Table 2. Serious adverse events (SAE)

### BRACE Stage 1

| Participant | Sex | Vaccine group | Onset following vaccination | Description of adverse event                                                                                                                                                                                                                                                                                                                                                                                                                          | SAE type <sup>a</sup> | Treatment                                                                                                                | Relationship to vaccine <sup>b</sup><br><br>Site Investigator (S) assessment<br><br>MCRI Sponsor (M) assessment | Severity of SAE <sup>c</sup> | Outcome                |
|-------------|-----|---------------|-----------------------------|-------------------------------------------------------------------------------------------------------------------------------------------------------------------------------------------------------------------------------------------------------------------------------------------------------------------------------------------------------------------------------------------------------------------------------------------------------|-----------------------|--------------------------------------------------------------------------------------------------------------------------|-----------------------------------------------------------------------------------------------------------------|------------------------------|------------------------|
| 1           | F   | Influenza+BCG | 8 hours                     | Sudden onset severe headache ('worst headache in life') then myalgia, vomiting, fever 38.3°C, tachycardia. COVID-19 testing negative. Taken to hospital via ambulance.                                                                                                                                                                                                                                                                                | 3                     | Hospitalisation overnight: Intravenous paracetamol, ondansetron, metoclopramide, fluid therapy.                          | (S)(M) Possibly related to influenza vaccine                                                                    | Severe                       | Discharged home Day 2  |
| 2           | F   | Influenza+BCG | 10 hours                    | Developed sore throat and felt unwell on evening of Day 1. Day 2 woke up with sore throat, wheeze and cough. Known past medical history of mild asthma. Used salbutamol inhaler at home, with limited effect. COVID-19 testing negative. Worsening cough and wheeze over next few hours led to emergency department (ED) presentation. In ED, afebrile, no sign of respiratory distress or audible wheeze on auscultation. Mild erythematous pharynx. | 7                     | Emergency department presentation: salbutamol nebuliser and 25mg of oral prednisolone. Discharged home within two hours. | (S)(M) Possibly related to influenza vaccine in the context of past medical history of previous mild asthma.    | Severe                       | Discharged home Day 2  |
| 3           | F   | Influenza+BCG | Day 58                      | Overnight hospitalisation for an episode of pyelonephritis, on a background of chronic urological health issues (long term stoma and indwelling catheter). Frequent urinary tract infections.                                                                                                                                                                                                                                                         | 3                     | Hospitalisation overnight: 24 hours of intravenous antibiotics and intravenous fluid therapy.                            | (S)(M) Unrelated                                                                                                | Severe                       | Discharged home Day 59 |
| 4           | F   | Influenza+BCG | Day 68                      | Hospitalisation for shoulder surgery secondary to workplace accident.                                                                                                                                                                                                                                                                                                                                                                                 | 3                     | Hospitalisation: shoulder surgery                                                                                        | (S)(M) Unrelated                                                                                                | Severe                       | Discharged home Day 70 |
| 5           | F   | Influenza+BCG | Day 71                      | 5-night hospitalisation for abdominal pain with history of diverticulitis. Diagnosed with diverticulitis.                                                                                                                                                                                                                                                                                                                                             | 3                     | Hospitalisation: antibiotics and analgesia                                                                               | (S)(M) Unrelated                                                                                                | Severe                       | Discharged home Day 77 |
| 6           | F   | Influenza+BCG | Day 63                      | Hospitalisation for unmanageable back pain and altered sensation in left foot. MRI spine diagnosis of L5 & S1 nerve impingement and L4, L5, S1 disc prolapse. Past history of fractured back in childhood.                                                                                                                                                                                                                                            | 3                     | Hospitalisation: CT-guided nerve block, analgesia and supportive care. Insertion of indwelling catheter                  | (S)(M) Unrelated                                                                                                | Severe                       | Discharged home Day 71 |
| 7           | F   | Influenza+BCG | Day 23                      | 2-night hospitalisation for acute appendicitis                                                                                                                                                                                                                                                                                                                                                                                                        | 3                     | Hospitalisation: laparoscopic appendectomy                                                                               | (S) Unlikely<br>(M) Unrelated                                                                                   | Severe                       | Discharged home Day 25 |
| 8           | F   | Influenza+BCG | Day 23                      | Hospitalisation for mental health concerns.                                                                                                                                                                                                                                                                                                                                                                                                           | 3                     | Hospitalisation                                                                                                          | (S)(M) Unrelated                                                                                                | Severe                       | Discharged home Day 26 |
| 9           | F   | Influenza+BCG | Day 17                      | Hospitalisation for hand/wrist cellulitis; infected cat bites, multiple puncture marks.                                                                                                                                                                                                                                                                                                                                                               | 3                     | Hospitalisation: surgical washout and debridement of injured right hand/wrist and antibiotics.                           | (S)(M) Unrelated                                                                                                | Severe                       | Discharged home Day 19 |
| 10          | F   | Influenza     | Day 20                      | Overnight hospitalisation for infected sebaceous cyst on neck.                                                                                                                                                                                                                                                                                                                                                                                        | 3                     | Hospitalisation: drainage of cyst and intravenous antibiotics                                                            | (S)(M) Unrelated                                                                                                | Severe                       | Discharged home Day 21 |

|    |   |           |        |                                                                                                                                                                                                                                      |   |                                                                                                       |                               |        |                        |
|----|---|-----------|--------|--------------------------------------------------------------------------------------------------------------------------------------------------------------------------------------------------------------------------------------|---|-------------------------------------------------------------------------------------------------------|-------------------------------|--------|------------------------|
| 11 | F | Influenza | Day 27 | 4-day hospitalisation for fever, sore throat, headaches, photophobia. Investigated for COVID-19 (negative), blood cultures, urine, brain imaging, lumbar puncture. Diagnosis: tonsillitis                                            | 3 | Hospitalisation: intravenous fluid therapy for 3 days, antibiotics and antivirals. Regular analgesia  | (S)(M) Unrelated              | Severe | Discharged home Day 33 |
| 12 | F | Influenza | Day 64 | Hospitalisation for two nights for fractured ankle requiring internal fixation.                                                                                                                                                      | 3 | Hospitalisation: surgery for fractured ankle requiring internal fixation.                             | (S)(M) Unrelated              | Severe | Discharged home Day 66 |
| 13 | M | Influenza | Day 80 | Hospitalisation for sports injury; lower limb fractures requiring surgery.                                                                                                                                                           | 3 | Hospitalisation: surgery for lower limb fractures.                                                    | (S)(M) Unrelated              | Severe | Discharged home Day 82 |
| 14 | F | Influenza | Day 83 | 5-day hospitalisation for mental health concerns. Tested negative twice for COVID-19 during hospital stay (respiratory symptoms).                                                                                                    | 3 | Hospitalisation                                                                                       | (S)(M) Unrelated              | Severe | Discharged home Day 88 |
| 15 | M | Influenza | Day 56 | 2-night hospitalisation for lower abdominal pain due to diverticulitis.                                                                                                                                                              | 3 | Hospitalisation: antibiotics and analgesia                                                            | (S) Unlikely<br>(M) Unrelated | Severe | Discharged home Day 58 |
| 16 | F | Influenza | Day 14 | Hospitalisation for investigation for iron deficiency and possible inflammatory bowel syndrome; During hospitalisation, fell and hit head, with subsequent seizure. Found to have hyponatraemia, Past history of childhood epilepsy. | 3 | Hospitalisation: seizure investigations, electrolyte abnormality corrected, prophylactic antibiotics. | (S)(M) Unrelated              | Severe | Discharged home Day 17 |

## BRACE Stage 2

| Participant | Sex | Vaccine group | Onset following vaccination | Description of adverse event                                                                                                                                       | SAE type <sup>a</sup> | Treatment                                                                                      | Relationship to vaccine <sup>b</sup> |                             | Severity of SAE <sup>c</sup> | Outcome                         |
|-------------|-----|---------------|-----------------------------|--------------------------------------------------------------------------------------------------------------------------------------------------------------------|-----------------------|------------------------------------------------------------------------------------------------|--------------------------------------|-----------------------------|------------------------------|---------------------------------|
|             |     |               |                             |                                                                                                                                                                    |                       |                                                                                                | Site Investigator (S) assessment     | MCRI Sponsor (M) assessment |                              |                                 |
| 1           | F   | BCG           | Day 21                      | Hospitalisation for injection site abscess with pus discharge (approx. 80ml) and systemic symptoms. Plastics team review on readmission and immunology assessment. | 3                     | Hospitalisation: IV flucloxacillin and gentamicin, IV fluids                                   | (S)(M) Probable                      |                             | Severe                       | Discharged home Day 37          |
| 2           | F   | BCG           | Day 78                      | Overnight hospitalisation in emergency department for Crohn's disease                                                                                              | 3                     | Hospitalisation: faecal calprotectin test. Crohn's disease diagnosed on subsequent colonoscopy | (S)(M) Unlikely                      |                             | Severe                       | Discharged home Day 79          |
| 3           | F   | BCG           | Day 29                      | Hospitalisation for cellulitis secondary to a cat scratch on right hand. No associated lymphadenopathy or fever. Injection site reaction healing well.             | 3                     | Hospitalisation: IV antibiotics                                                                | (S)(M) Unrelated                     |                             | Severe                       | Discharged home Day 31          |
| 4           | F   | BCG           | Day 5                       | Discovered lump in right breast; referred to breast specialist; biopsy diagnosis of breast cancer.                                                                 | 7                     | Chemotherapy                                                                                   | (S)(M) Unrelated                     |                             | Severe                       | Withdrawal from study on Day 12 |
| 5           | M   | BCG           | Day 24                      | Hospitalisation for acute vomiting, diarrhoea and dehydration.                                                                                                     | 3                     | Hospitalisation: hydration                                                                     | (S)(M) Unrelated                     |                             | Severe                       | Discharged home Day 25          |
| 6           | M   | BCG           | Day 43                      | Hospitalisation for COVID-19; mechanical ventilation in intensive care unit.                                                                                       | 2                     | Hospitalisation: mechanical ventilation                                                        | (S)(M) Unrelated                     |                             | Life-threatening             | Discharged home Day 139         |

|    |   |         |        |                                                                                                                                                                                                 |   |                                                                                                 |                  |                  |                           |
|----|---|---------|--------|-------------------------------------------------------------------------------------------------------------------------------------------------------------------------------------------------|---|-------------------------------------------------------------------------------------------------|------------------|------------------|---------------------------|
| 7  | F | BCG     | Day 91 | Hospitalisation for COVID-19 pneumonia.                                                                                                                                                         | 3 | Hospitalisation                                                                                 | (S)(M) Unrelated | Severe           | Discharged home Day 96    |
| 8  | M | BCG     | Day 68 | Hospitalisation for acute appendicitis.                                                                                                                                                         | 3 | Hospitalisation                                                                                 | (S)(M) Unrelated | Severe           | Discharged home Day 69    |
| 9  | M | BCG     | Day 46 | Hospitalisation for COVID-19; mechanical ventilation in intensive care unit.                                                                                                                    | 2 | Hospitalisation: mechanical ventilation                                                         | (S)(M) Unrelated | Life-threatening | Discharged home Day 64    |
| 10 | F | BCG     | Day 65 | Hospitalised for cardiac symptoms, related to underlying chronic disease.                                                                                                                       | 3 | Hospitalisation                                                                                 | (S)(M) Unrelated | Severe           | Discharged home Day 68    |
| 11 | F | BCG     | Day 73 | Hospitalisation for COVID-19; presented with shortness of breath and decompensated diabetes (ketoacidosis).                                                                                     | 2 | Hospitalisation: intensive care unit                                                            | (S)(M) Unrelated | Life-threatening | Discharged home Day 82    |
| 12 | M | BCG     | Day 54 | First hospitalisation: overnight admission to intensive care unit following planned surgery for transurethral resection of the prostate and removal of wires from previously fractured patella. | 4 | Hospitalisation: intensive care unit, cardiac echocardiogram, right leg Doppler ultrasound.     | (S)(M) Unrelated | Life-threatening | Discharged home Day 79    |
| 13 | M | BCG     | Day 80 | Second hospitalisation for fever and haematuria following transurethral resection of the prostate.                                                                                              | 3 | Hospitalisation: urinary tract ultrasound, septic work-up.                                      | (S)(M) Unrelated | Severe           | Discharged home Day 84    |
| 14 | F | BCG     | Day 91 | Hospitalisation for cough and shortness of breath; COVID-19 negative.                                                                                                                           | 2 | Hospitalisation                                                                                 | (S)(M) Unrelated | Severe           | Discharged home Day 94    |
| 15 | M | BCG     | Day 86 | Hospitalisation for appendicitis, with emergency surgery.                                                                                                                                       | 3 | Hospitalisation: emergency surgery                                                              | (S)(M) Unrelated | Severe           | Discharged home Day 88    |
| 16 | F | BCG     | Day 37 | Hospitalisation for epigastric pain.                                                                                                                                                            | 3 | Hospitalisation: symptomatic treatment                                                          | (S)(M) Unrelated | Severe           | Discharged home Day 40    |
| 17 | F | BCG     | Day 20 | Hospitalisation for abdominal pain; gallstone blocking bile duct.                                                                                                                               | 3 | Hospitalisation: surgery to remove gallstones                                                   | (S)(M) Unrelated | Severe           | Discharged home Day 25    |
| 18 | F | BCG     | Day 89 | Prolonged hospitalisation due to complication following endoscopic submucosal dissection for removal of a rectal carcinoma.                                                                     | 3 | Hospitalisation: surgery for removal of carcinoma. No chemotherapy or radiotherapy requirement. | (S)(M) Unrelated | Severe           | Discharged home on Day 91 |
| 19 | F | BCG     | Day 88 | Hospitalisation for renal infection.                                                                                                                                                            | 2 | Hospitalisation                                                                                 | (S)(M) Unrelated | Severe           | Discharged home Day 91    |
| 20 | F | BCG     | Day 63 | Hospitalisation for psychiatric illness – depression.                                                                                                                                           | 2 | Hospitalisation                                                                                 | (S)(M) Unrelated | Life-threatening | Discharged home Day 77    |
| 21 | F | BCG     | Day 4  | Hospitalisation for vascular catheterisation; participant fell in pool and damaged portacath. Portacath had been inserted three years prior during management of breast cancer.                 | 2 | Hospitalisation: vascular catheterisation for removal of damaged portacath                      | (S)(M) Unrelated | Severe           | Discharged home Day 5     |
| 22 | F | Placebo | Day 25 | Hospitalisation for COVID-19; mechanical ventilation in intensive care unit.                                                                                                                    | 2 | Hospitalisation: mechanical ventilation                                                         | (S)(M) Unrelated | Death            | Death on Day 49           |
| 23 | M | Placebo | Day 21 | Hospitalisation for COVID-19.                                                                                                                                                                   | 2 | Hospitalisation: non-invasive ventilation                                                       | (S)(M) Unrelated | Life-threatening | Discharged home Day 28    |
| 24 | F | Placebo | Day 28 | Hospitalisation for COVID-19.                                                                                                                                                                   | 2 | Hospitalisation: non-invasive ventilation                                                       | (S)(M) Unrelated | Life-threatening | Discharged home Day 31    |
| 25 | F | Placebo | Day 90 | Hospitalisation for ankle fracture injury secondary to being run-over.                                                                                                                          | 3 | Hospitalisation: ankle surgery (right tibia)                                                    | (S)(M) Unrelated | Severe           | Discharged home Day 96    |

|    |   |         |        |                                                                                                                               |   |                                                                                         |                  |                  |                         |
|----|---|---------|--------|-------------------------------------------------------------------------------------------------------------------------------|---|-----------------------------------------------------------------------------------------|------------------|------------------|-------------------------|
| 26 | F | Placebo | Day 72 | Hospitalisation for femur fracture secondary to skate fall.                                                                   | 3 | Hospitalisation: hip surgery (left femur)                                               | (S)(M) Unrelated | Severe           | Discharged home Day 78  |
| 27 | M | Placebo | Day 39 | Hospitalisation for myocardial infarction.                                                                                    | 3 | Hospitalisation                                                                         | (S)(M) Unrelated | Severe           | Discharged home Day 42  |
| 28 | M | Placebo | Day 82 | Hospitalisation for dengue with complications.                                                                                | 2 | Hospitalisation                                                                         | (S)(M) Unrelated | Life-threatening | Discharged home Day 85  |
| 29 | M | Placebo | Day 86 | Hospitalisation for COVID-19; shortness of breath presentation.                                                               | 2 | Hospitalisation                                                                         | (S)(M) Unrelated | Life-threatening | Discharged home Day 101 |
| 30 | F | Placebo | Day 15 | Hospitalisation for blunt cut injury to left hand (with left index finger paraesthesia) secondary to domestic knife incident. | 3 | Hospitalisation: exploratory surgery for neurological damage and carpal tunnel release. | (S)(M) Unrelated | Severe           | Discharged home Day 16  |

Note: day 1= day of vaccination

**<sup>a</sup> SAE type = criteria for seriousness**

1. Resulted in death
2. Immediately life-threatening
3. Requires inpatient hospitalisation (i.e. minimum overnight admission that is non-elective).
4. Results in prolongation of existing hospitalisation
5. Results in persistent or significant disability/incapacity
6. Is a congenital anomaly/birth defect
7. In the medical judgment of the treating physician and/or investigator, it may jeopardise the participant or require intervention to prevent one of the above outcomes

**<sup>b</sup> Severity of SAE:**

- Severe (severe medically significant but not immediately life threatening)
- Life-threatening (immediately life-threatening)
- Death related to adverse event

**<sup>c</sup> Definition of relationship to the intervention**

- Unrelated (The AE is clearly NOT related to intervention)
- Unlikely (The AE is doubtfully related to the intervention)
- Possible (The AE may be related to the intervention)
- Probable (The AE is likely related to the intervention)
- Definite (The AE is clearly related to the intervention)

**Supplementary Table 3.** Vaccination during pregnancy

| Participant | Vaccine | Country | Age (years) at vaccination | BMI (kg/m <sup>2</sup> ) | Co-morbidity | Smoker | GA at vaccination | GA at delivery | Pregnancy outcome           | Congenital anomaly or birth defect |
|-------------|---------|---------|----------------------------|--------------------------|--------------|--------|-------------------|----------------|-----------------------------|------------------------------------|
| 1           | BCG     | Brazil  | 36                         | 28                       | No           | No     | 2 weeks + 1 day   | 37 weeks       | Baby born alive and healthy | No                                 |
| 2           | Placebo | Brazil  | 30                         | 41                       | No           | Yes    | 7 weeks + 1 day   | 40 weeks       | Baby born alive and healthy | No                                 |
| 3           | Placebo | Brazil  | 34                         | 25                       | No           | No     | 3 weeks + 6 days  | 39 weeks       | Baby born alive and healthy | No                                 |
| 4           | Placebo | Brazil  | 38                         | 23                       | No           | No     | 2 weeks           | 40 weeks       | Baby born alive and healthy | No                                 |
